# Supplementary material
Source: bioRxiv or medRxiv preprint supplement (https://www.medrxiv.org/highwire/filestream/80618/field_highwire_adjunct_files/0/2020.05.08.20095935-1.pdf)
Supplement: Supplementary file [file 2020.05.08.20095935-1.pdf]

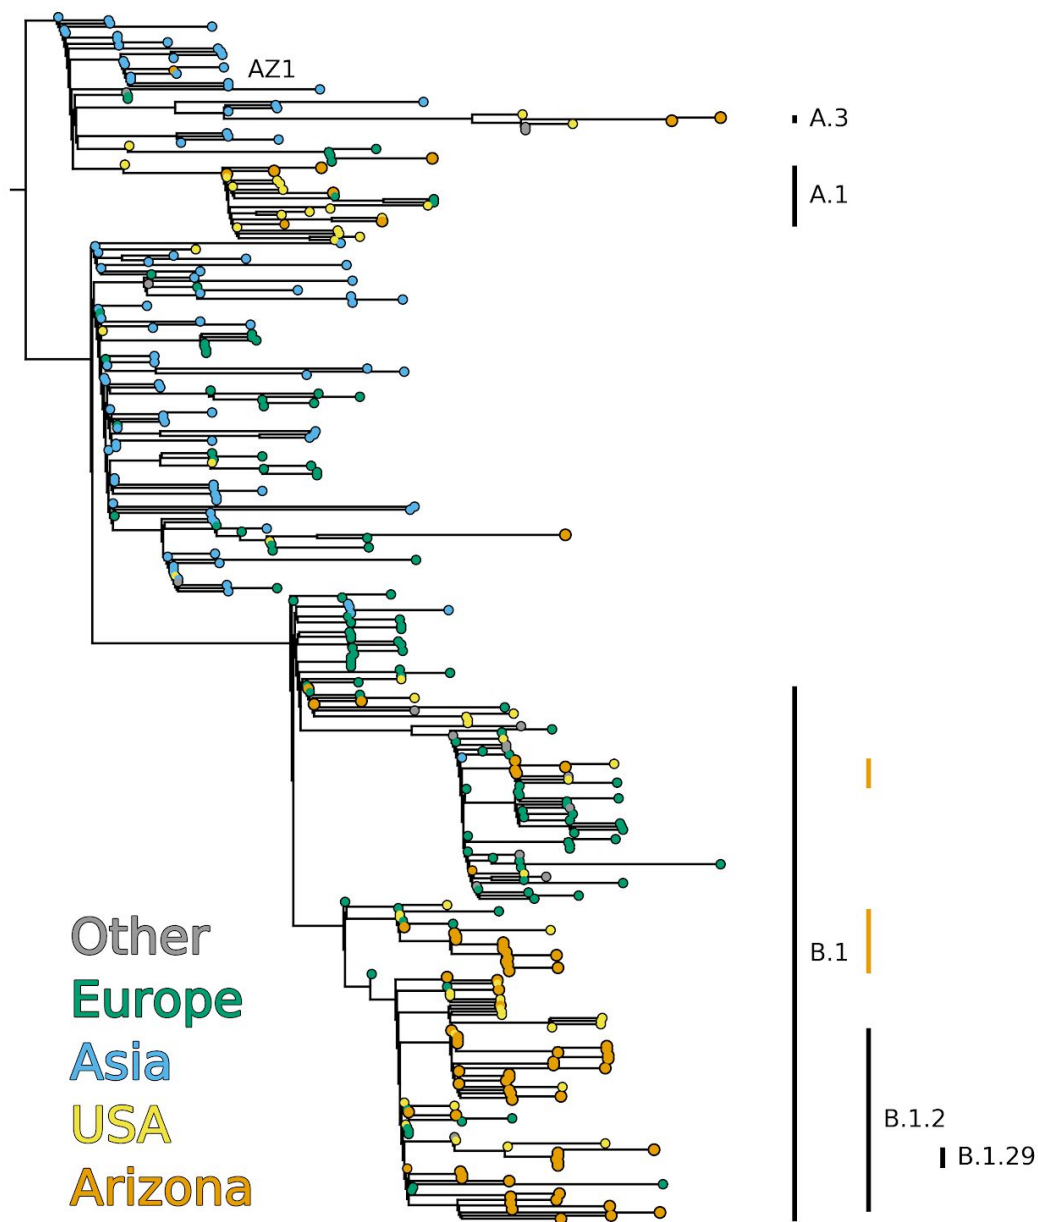

**Supplementary Figure 1.** Maximum-likelihood phylogeny inferred from 384 SARS-CoV-2 genomes, including 80 from Arizona and 304 representatives from around the world. Tips are colored by origin of sequence, and major lineages assigned by Pangolin, with more than 2 sequence representatives in Arizona, are labeled and indicated by black vertical bars. Orange vertical bars indicate well-supported (Bayesian posterior >0.99 and bootstrap support  $\geq 65$ ) sublineages of B.1, which were not uniquely named by Pangolin. The existence of these sublineages, with members from around the world, strongly supports the fact that the “B.1” lineage was introduced to Arizona multiple times. The tree was visualized with a custom Python script that utilized the software package BALTIC (<https://github.com/evogytis/baltic>).

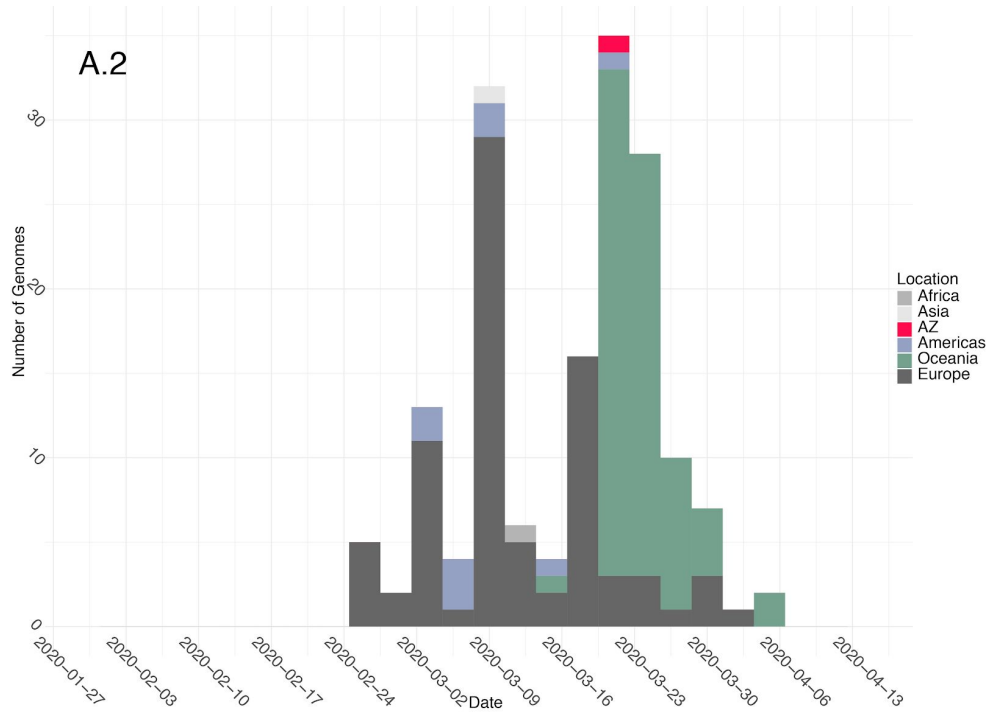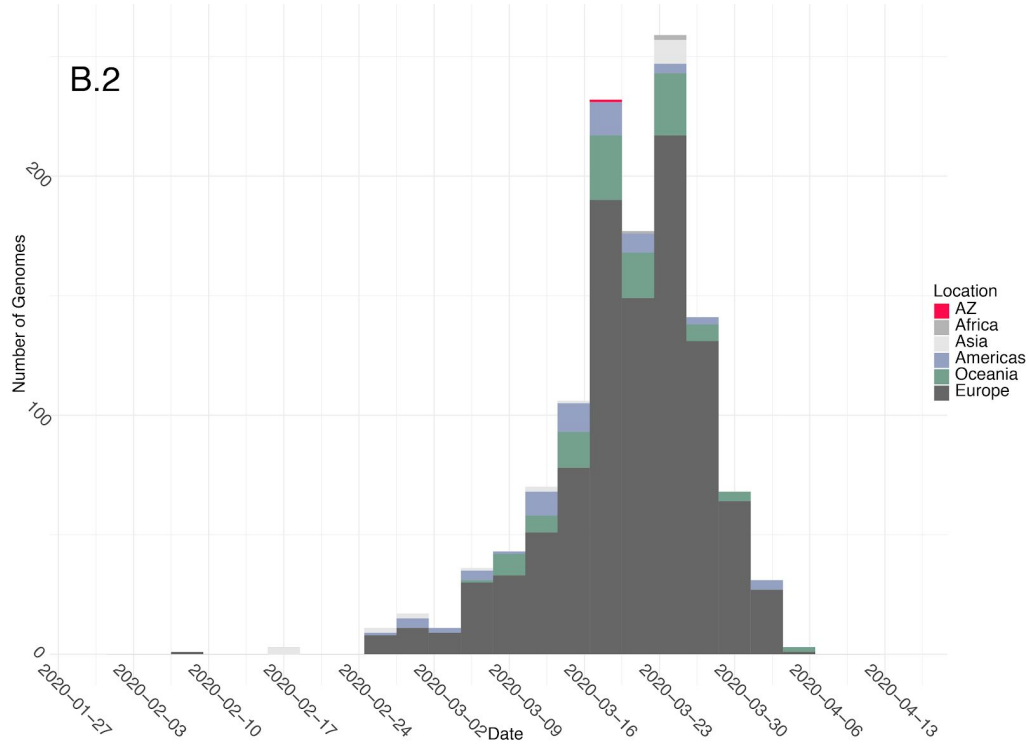

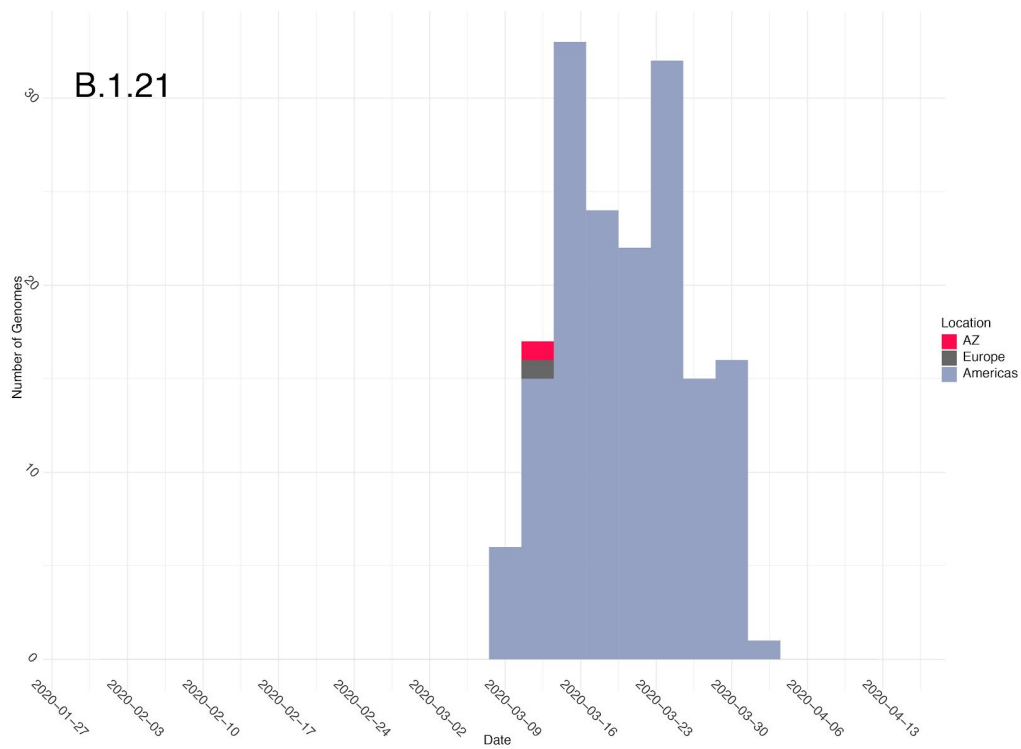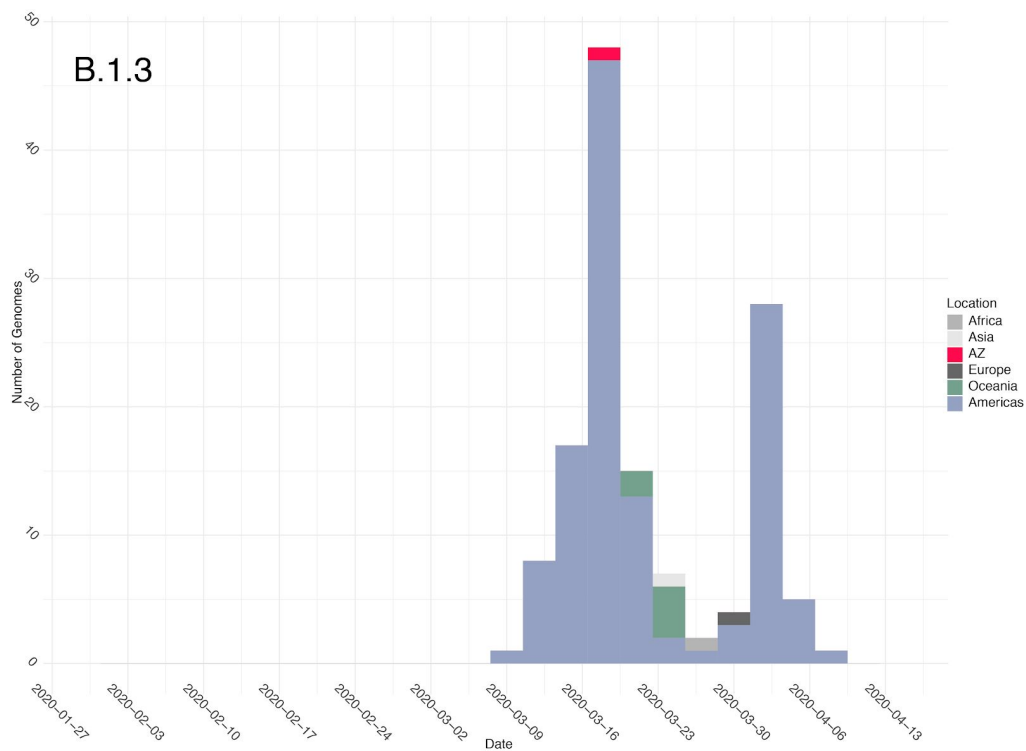

**Supplementary Figure 2. Sequence database representation through time for the 4 introductions with only 1 sequence representative from Arizona.** Stacked bars are colored according to location. Lineages were assigned using Pangolin for all sequences uploaded to GISAID as of 4/16/2020.

**Supplementary Table 3. Genome representation from each Arizona county.** This does not include all genomes because some are from unknown counties.

| <b>County</b>     | <b>Number of positive cases*</b> | <b>Number of genomes sequenced</b> |
|-------------------|----------------------------------|------------------------------------|
| Apache            | 118                              | 0                                  |
| Cochise           | 18                               | 1                                  |
| Coconino          | 299                              | 22                                 |
| Gila              | 5                                | 0                                  |
| Graham            | 2                                | 1                                  |
| Greenlee          | 2                                | 0                                  |
| La Paz            | 5                                | 1                                  |
| Maricopa          | 2,264                            | 31                                 |
| Mohave            | 51                               | 1                                  |
| Navajo            | 410                              | 4                                  |
| Pima              | 760                              | 4                                  |
| Pinal             | 197                              | 7                                  |
| Santa Cruz        | 14                               | 0                                  |
| Yavapai           | 68                               | 3                                  |
| Yuma              | 21                               | 1                                  |
| <b>Totals</b>     | <b>4234</b>                      | <b>76</b>                          |
| * As of 4/16/2020 |                                  |                                    |

Supplementary Table 4. In silico screen of commonly used primers/probes to detect SARS-CoV-2.

| Assay            | Forward                       | Reverse                     | Probe                            | Total | Hits | Misses | Ambiguities |
|------------------|-------------------------------|-----------------------------|----------------------------------|-------|------|--------|-------------|
| Orf1ab           | CCCTGTGGGTTTT<br>ACACTTAA     | ACGATTGTGCAT<br>CAGCTGA     | CCGTCTGCGGTATG<br>TGGAAAGGTTATGG | 384   | 366  | 0      | 18          |
| N<br>(China)     | GGGGAACCTTCTCC<br>TGCTAGAAT   | CAGACATTTTGTCT<br>CTCAAGCTG | TTGCTGCTGCTTGA<br>CAGATT         | 384   | 324  | 57     | 3           |
| n_cov_<br>n1     | GACCCCAAATCA<br>GCGAAAT       | TCTGGTTACTGC<br>CAGTTGAAT   | ACCCCGCATTACGT<br>TTGGTGGACC     | 384   | 375  | 6      | 3           |
| n_cov_<br>n2     | TTACAAACATTGG<br>CCGCAA       | GCGCGACATTCC<br>GAAGAA      | ACAATTTGCCCCA<br>GCGCTTCAG       | 384   | 382  | 0      | 2           |
| n_cov_<br>n3     | GGGAGCCTTGAAT<br>ACACCAAAA    | TGTAGCACGATT<br>GCAGCATTG   | AYCACATTGGCACC<br>CGCAATCCTG     | 384   | 382  | 0      | 2           |
| E<br>(Sarbeco)   | ACAGGTACGTAA<br>TAGTTAATAGCGT | ATATTGCAGCAG<br>TACGCACACA  | ACACTAGCCATCCT<br>TACTGCGCTTCG   | 384   | 380  | 2      | 2           |
| nsp10<br>(China) | CCCTGTGGGTTTT<br>ACACTTAA     | ACGATTGTGCAT<br>CAGCTGA     | CCGTCTGCGGTATG<br>TGGAAAGGTTATGG | 384   | 366  | 0      | 18          |
| nsp14            | TAATCAGACAAGG<br>AACTGATTA    | CGAAGGTGTGAC<br>TTCCATG     | GCAAATTGTGCAAT<br>TTGCGG         | 384   | 380  | 2      | 2           |
| N<br>(HKU)       | TAATCAGACAAGGAA<br>CTGATTA    | CGAAGGTGTGACT<br>TCCATG     | GCAAATTGTGCAATTT<br>GCGG         | 384   | 379  | 2      | 3           |
| nsp14<br>(HKU)   | TGGGGYTTTACRGGT<br>AACCT      | AACRCGCTTAACAA<br>AGCACTC   | TAGTTGTGATGCWATC<br>ATGACTAG     | 384   | 381  | 0      | 3           |
| RdRp<br>(IP2)    | ATGAGCTTAGTCC<br>TGTTG        | CTCCCTTTGTTGT<br>GTTGT      | AGATGTCTTGTGCT<br>GCCGGTA        | 383   | 383  | 0      | 1           |
| RDRP<br>(IP4)    | GGTAACTGGTATG<br>ATTTTCG      | CTGGTCAAGGTT<br>AATATAGG    | TCATACAAACCACG<br>CCAGG          | 384   | 384  | 0      | 0           |
